# Supplementary material for: Provenance, protolith and metamorphic ages of jadeite-bearing orthogneiss and host paragneiss at Tavagnasco, the Sesia Zone, Lower Aosta Valley, Italy
Source: Copernicus journal article supplement (doi:10.5194/ejm-35-645-2023), 2023-08-15
Supplement: Supplementary file 1 [file ejm-35-645-2023-supplement.zip]

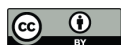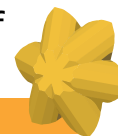

*Supplement of*

**Provenance, protolith and metamorphic ages of jadeite-bearing orthogneiss and host paragneiss at Tavagnasco, the Sesia Zone, Lower Aosta Valley, Italy**

**Jane A. Gilotti et al.**

*Correspondence to:* Jane A. Gilotti ([jane-gilotti@uiowa.edu](mailto:jane-gilotti@uiowa.edu))

- [ejm-35-645-2023-supplement-title-page.pdf](#)
- [Supplemental Data Tables S1,2,3.xls](#)

The copyright of individual parts of the supplement might differ from the article licence.
